## **Ecological and microbiological diversity of chigger mites, including vectors of scrub typhus, on small mammals across stratified habitats in Thailand**

**Kittipong Chaisiri<sup>1,2</sup>, A. Christina Gill<sup>1,3</sup>, Alexandr A. Stekolnikov<sup>4</sup>, Soawapak Hinjoy<sup>5</sup>, John W. McGarry<sup>6</sup>, Alistair C. Darby<sup>7</sup>, Serge Morand<sup>8</sup>, Benjamin L. Makepeace<sup>1</sup>**

<sup>1</sup>Institute of Infection & Global Health, University of Liverpool, Liverpool, UK.

<sup>2</sup>Faculty of Tropical Medicine, Mahidol University, Bangkok, Thailand.

<sup>3</sup>Biomedical Services, University of Oxford, Oxford, UK

<sup>4</sup>Zoological Institute, Russian Academy of Sciences, Saint Petersburg, Russia.

<sup>5</sup>Department of Disease Control, Ministry of Public Health, Nonthaburi, Thailand.

<sup>6</sup>Institute of Veterinary Science, University of Liverpool, Liverpool, UK.

<sup>7</sup>Institute of Integrative Biology, University of Liverpool, Liverpool, UK.

<sup>8</sup>Faculty of Veterinary Technology, Kasetsart University, Bangkok, Thailand.

**Running title:** Chigger mite ecology and microbiomes in Thailand

1

## **Abstract**

2 Scrub typhus, caused by a bacterial pathogen (*Orientia* spp.), is a potentially life-threatening febrile  
3 illness widely distributed in the Asia-Pacific region and is emerging elsewhere. The infection is  
4 transmitted by the larval stage of trombiculid mites (“chiggers”) that often exhibit low host  
5 specificity. Here, we present an analysis of chigger ecology for 38 species sampled from 11 provinces  
6 of Thailand and microbiomes for eight widespread species. In total, >16 000 individual chiggers were  
7 collected from 1 574 small mammal specimens belonging to 18 species across four horizontally-  
8 stratified habitat types. Chigger species richness was positively associated with higher latitudes, dry  
9 seasonal conditions, and host maturity; but negatively associated with increased human land use.  
10 Human scrub typhus incidence was found to be positively correlated with chigger species richness.  
11 The bacterial microbiome of chiggers was highly diverse, with *Sphingobium*, *Mycobacterium*,  
12 *Neisseriaceae* and various *Bacillales* representing the most abundant taxa. Only *Leptotrombidium*  
13 *deliense* was found to be infected with *Orientia*.  $\beta$ -diversity, but not  $\alpha$ -diversity, was significantly  
14 different between chigger species and geographic regions, although not between habitat types. This  
15 first field survey of the chigger microbiome provides a framework for future studies on interactions  
16 between pathogens and other symbionts in these understudied vectors.

## 17 Introduction

18 The Trombiculoidea is a superfamily of mites (Acari: Acariformes) with a unique mode of parasitism  
19 among medically-relevant arthropod vectors. The larval stage, colloquially known as chiggers or  
20 berry bugs, is ectoparasitic on vertebrates (or occasionally invertebrates). In contrast, the  
21 deutonymph and adult stages have an edaphic lifestyle and are free-living predators of arthropods  
22 or their eggs [1]. Chiggers are the exclusive biological vectors of scrub typhus, a potentially life-  
23 threatening febrile illness of humans that historically has been associated only with the Asia-Pacific  
24 region [2]. However, recently endemic scrub typhus has been reported from the Middle East [3] and  
25 South America [4], and local transmission is suspected in sub-Saharan Africa [5]. The main  
26 aetiological agent of the disease, *Orientia tsutsugamushi* (Rickettsiales: *Rickettsiaceae*), is a  
27 vertically-transmitted chigger symbiont [6].

28 The epidemiology of scrub typhus remains poorly understood, largely because chiggers are minute  
29 (typically <250  $\mu\text{m}$  in length) and very challenging to identify and utilise for molecular  
30 characterisation and screening [7]. In particular, interactions between climatic and physical  
31 geography, wild vertebrate hosts, and human disturbance of the environment with chigger species  
32 richness and abundance, and how these variables impact on scrub typhus incidence, are largely  
33 unexplored in most endemic regions. Moreover, our understanding of the bacterial associates of  
34 chiggers is mainly restricted to *O. tsutsugamushi* and a very small number of other potential human  
35 pathogens, such as *Bartonella* spp. [8] and *Rickettsia* spp [9]. As many cases of epidemiological-  
36 relevant interactions between human pathogens and the microbiome of arthropod vectors have  
37 been reported, our ignorance regarding the chigger microbiome is of potential concern for disease  
38 control. Indeed, this was highlighted recently by a 16S rRNA amplicon survey of a colony of the scrub  
39 typhus vector *Leptotrombidium imphalum*, which revealed a hitherto unrecognised association  
40 between a novel member of the *Amoebophilaceae* and *O. tsutsugamushi* in adult female mites [10].  
41 The completion of the *Leptotrombidium deliense* genome project also uncovered an intimate

42 relationship between chiggers and soil bacteria and fungi, as genes for secondary metabolism have  
43 been acquired by lateral transfer from these microorganisms [11].

44 Among scrub typhus-endemic countries, Thailand has some of the highest incidence rates. The Thai  
45 Bureau of Epidemiology reported an increase in annual minimum incidence from 6.0 per 100 000  
46 persons in 2003 to 17.1 per 100 000 in 2013 [2]. The role of the vector in this increase is unknown,  
47 but the higher prevalence of *O. tsutsugamushi* in small mammal chigger hosts from forested regions  
48 relative to areas with greater human disturbance implicates land use as a key factor in disease risk  
49 [12]. Here, we present an analysis of chigger distributions on small mammals across 11 provinces of  
50 Thailand, their associations with habitat types stratified by human disturbance, and the microbiomes  
51 of nine widely-distributed chigger species. We show that chigger species richness is influenced by  
52 mammalian host status, climatic factors and land use; whereas chigger species and geographic  
53 region, but not habitat type, significantly impact on the  $\beta$ -diversity of chigger microbiomes.

## 54 **Materials & Methods**

55 For a more detailed description of the Materials and Methods, see Supplemental Materials and  
56 Methods.

### 57 *Trapping of small mammals and chigger collections*

58 This study utilised chigger material collected previously for a taxonomic study in Thailand [13]. In  
59 brief, small mammals were trapped across 13 localities between 2008 – 2015, once each in the dry  
60 season and wet season. Chiggers were removed from mammal cadavers and fixed in 70 - 95%  
61 ethanol. Mites collected from each animal were counted to estimate infestation intensity and  
62 chigger abundance, as defined by Rózsa *et al.* [14]. For identification and species richness estimation,  
63 10-20% of chiggers from each host animal were selected using size and microscopic appearance as a  
64 guide to obtain a representative sub-sample.

### 65 *Ecological analysis*

66 For ecological analysis, trapping sites were divided equally into four different types of habitats with  
67 respect to human land use (anthropization index), spanning low to high levels of disturbance [15-17].  
68 Calculation of infestation intensity statistics of conspecific chigger species were performed using the  
69 “BiodiversityR” package. In addition, 12 chigger species that infested  $\geq 10$  individual hosts were  
70 included in an analysis of association with habitat type using the “FactoMineR” package in R.

#### 71 *Network analyses of host-chigger interactions*

72 To study the community ecology of host-chigger interactions, bipartite network analyses of host-  
73 ectoparasite interactions were conducted at both community (pooled host species or pooled  
74 locations) and individual levels using “vegan” [18] and “bipartite” packages [19] implemented in R  
75 freeware. Bipartite networks were transformed to unipartite networks using the “tnet” package  
76 [20]. Unipartite network plots illustrate relative interaction patterns within a host community with  
77 respect to the co-occurrence of chigger species.

#### 78 *Multiple regression models of independent variables explaining chigger species richness*

79 Generalized linear models were constructed in order to identify potential effects of host attributes  
80 (species, sex, maturity and body mass) and ecological factors (habitat, site and season) on chigger  
81 species richness at the individual host level. Poisson regression models were created for chigger  
82 species richness count data using the “lme4” package [21] in R freeware. Selection of models was  
83 based on Akaike’s Information Criterion adjusted for small sample size (AICc) using the “gmulti”  
84 package [22] in R freeware. Data for scrub typhus human case numbers from the 13 studied sites  
85 were obtained from the Bureau of Epidemiology, Ministry of Public Health, Thailand (unpublished  
86 data).

#### 87 *DNA extraction*

88 As clearing in Berlese's fluid destroys DNA, chiggers destined for DNA extraction were identified  
89 using autofluorescence microscopy as previously described [7]. Genomic DNA was purified using the  
90 DNeasy Blood & Tissue Kit (Qiagen, Hilden, Germany).

#### 91 *Library preparation and next generation sequencing of 16S rRNA amplicons*

92 To determine the bacterial microbiome of chiggers, a dual-index nested PCR protocol for MiSeq  
93 (Illumina, San Diego, CA, USA) sequencing was applied [23-25] targeting the v4 region of the 16S  
94 rRNA gene. The second round indexing PCR was performed using the Nextera XT DNA protocol  
95 (Illumina). Each MiSeq run included three types of negative control to identify potential background  
96 contamination from sample manipulation equipment, DNA extraction kits and PCR reagents used in  
97 library preparation. Samples were submitted for sequencing with 300 bp paired-end chemistry on  
98 the Illumina MiSeq platform at the Centre for Genomic Research (University of Liverpool).

#### 99 *Microbiome profiling*

100 Analyses of 16S rRNA microbiome profile were performed using the Quantitative Insights into  
101 Microbial Ecology (QIIME) software package, version 1.8.0 [26]. Operational taxonomic units (OTUs)  
102 were created using an open-reference approach using the USEARCH61 method [27] whereby reads  
103 are binned at 97% similarity [27] against the Greengene database v. 13\_8 [28] followed by *de novo*  
104 OTU picking. Bacterial taxonomic assignment was performed with UCLUST. Chimeric sequences were  
105 removed using "ChimeraSlayer" [29].

#### 106 *Comparative analyses of the chigger microbiome*

107 Read counts were normalized to relative abundance for graphing or rarefied to 10 000 reads for  
108 diversity calculations. Bacterial communities were categorised according to sample type (individuals  
109 and pools), selected chigger species and study sites (mixed species), as well as soil samples from  
110 Thailand and Lao PDR. For details of  $\alpha$ - and  $\beta$ -diversity analyses, and principal coordinates analysis  
111 (PCoA), see Supplemental Materials and Methods.

112

113 *Geobacillus qPCR and Sanger sequencing*

114

115 A pair of PCR primers was designed to amplify a 16S rRNA gene portion for the genus *Geobacillus*  
116 and related Firmicutes. Individual, 25-pooled and 50-pooled chiggers, as well as water samples from  
117 the laboratory water bath (Grant Sub; Grant Instruments, Cambridge, UK) and Qiagen microbial  
118 DNA-free water (negative control), were used in the qPCR assay. DNA from chiggers and 10 µl of  
119 water bath samples were extracted using the DNeasy Blood & Tissue Kit (Qiagen).

120 Bacterial taxonomy was assigned using RDP Classifier Version 2.10 [30] available at  
121 <https://rdp.cme.msu.edu>, using a >80% confidence threshold [31]. The DNA sequences were aligned  
122 using ClustalW and phylogenetic tree construction was performed with the maximum likelihood  
123 method using Mega software version 6.06 [32].

124 *Determination of GC content in 16S rRNA sequences*

125 We evaluated whether the influence of GC content differentially affected data obtained from  
126 individual and pooled chiggers (low and high DNA concentration templates, respectively).  
127 Representative sequences of the dominant bacterial OTUs from individual and pooled chiggers were  
128 assessed for GC content using “Oligo Calc”, an oligonucleotide properties calculator available at  
129 <http://biotools.nubic.northwestern.edu/OligoCalc.html> [33] and their mean GC content was  
130 compared by two-sample *t*-test.

131 **Results**

132 *Chigger ecology and host associations*

133 A total of 16 761 chiggers were obtained from 1 574 small mammals belonging to 18 species. The  
134 overall infestation rate was 23.8%, with Bo Kleu district (Nan province) displaying the highest rate  
135 recorded for a single site (95%) (Table S1). The highest mean chigger intensity (113.3) was observed

136 in *Berylmys bowersi* (Bower's white-toothed rat) (Table S2). A subsample of 2 519 chiggers  
137 (approximately 15% of the total) were identified to the species level, revealing that *Rattus tanezumi*  
138 (Asian house rat) and *Bandicota indica* (greater bandicoot rat) exhibited the greatest chigger species  
139 richness (21 species each). Approximately half of the infested hosts (50.7%) harboured a single  
140 chigger species, 33.3% harboured two, and the remainder harboured  $\geq 3$  species. *Ascoshengastia*  
141 *indica* was most prevalent (7.31%; the only species recorded from every geographic region),  
142 followed by *L. deliense* (5.22%) and *Walchia micropelta* (5.16%) (Table S3).

143 A species accumulation curve plot demonstrated that the sample size of small mammals was  
144 sufficient to describe the chigger species diversity accurately, since a plateau was reached at around  
145 1,000 hosts (Fig. S1). Chigger species richness of sampling locations increased at higher latitudes  
146 (Spearman's rank correlation = 60.81,  $p = 0.0023$ ; Fig. S2) and varied significantly among the four  
147 habitat types (in descending order) of forest, dry land, rain-fed land, and human settlement at both  
148 an individual host level (Kruskal-Wallis statistic = 91.29,  $df = 3$ ,  $p < 0.0001$ ; Fig. 1b) and for the whole  
149 population (Fig. 1a). Moreover, while there were no seasonal differences in chigger species richness  
150 or abundance at the individual host level, chigger species richness was considerably higher in the dry  
151 season than in the wet season at the whole country level (Fig. 1c). Ecological specialisation of some  
152 of the most widespread chigger species (*A. indica*, *W. micropelta* and *Walchia pingue*) between  
153 habitat types was weak (Fig. 2). However, *L. deliense* showed a preference for areas in forest or dry  
154 land; whereas other species with more restricted distributions displayed predilections for human  
155 settlements (*Helenicula kohlsi*), rain-fed lowland (e.g., *Walchia minuscuta*) or dry landscapes  
156 (*Helenicula pilosa*) (Fig. 2).

157 Bipartite network analysis showed highly complex interactions between chigger and host species  
158 (Fig. 3a). The largest chigger species assemblages at the whole host population level were found on  
159 two rodent species associated with human settlements, *B. indica* and *R. tanezumi*. Interestingly, the  
160 only non-rodent hosts sampled in this study, *Hylomys suillus* (Erinaceomorpha: Erinaceidae) and



161 *Tupaia glis* (Scandentia: Tupaiidae), were parasitized by several chigger species never found on  
162 rodents (Fig. 3a). Overall however, more than half of chigger species were found on more than one  
163 host species, and the species-specificity for those found on >10 individual animals was only 0.171 –  
164 0.542. A unipartite network analysis supported the bipartite analysis, assigning *B. indica* and *R.*  
165 *tanezumi* with the highest Eigenvector centrality scores among all of the hosts (Fig. 3b).

#### 166 *Chigger-host properties and scrub typhus incidence*

167 For each of the 13 geographic sites, bipartite network properties of host-chigger interactions were  
168 calculated at the individual host level, including the nestedness metric based on overlap and  
169 decreasing fill (NODF), network connectance, links per species, and network modularity. The highest  
170 NODF and connectance were found in the Nakhonsawan network, where chigger species richness  
171 was only four species; while the Chiangrai network exhibited an elevated chigger species richness  
172 (12 species), but with the lowest NODF and connectance (Table S4). In contrast, Chiangrai displayed  
173 the highest modularity within the network, whereas the least network modularity was found in  
174 Prachuab Kirikhan (Table S4).

175 We tested the effect of various independent variables on individual chigger species richness using  
176 GLMs with model selection by Akaike's Information Criterion. Host species, host maturity, site and  
177 habitat (but not host sex) were significant variables in the best 10 models (Table S5; Fig. S3a).  
178 Animals captured in forest demonstrated significantly higher chigger species richness than hosts  
179 from human settlements (estimate = -1.074,  $p < 0.0001$ ; Table S6), and species richness was greater  
180 on mature hosts than on juveniles (estimate = -0.283,  $p = 0.004$ ; Table S6).

181 We then applied the same modelling approach but included human scrub typhus cases at district  
182 level with environmental variables (elevation, annual mean temperature and latitude; Table S7),  
183 chigger species richness, and network properties (Fig. S3b). Network connectance and chigger  
184 species richness strongly influenced local scrub typhus case numbers, as the two variables appeared

185 in the top 10 selected models (Table S8). Finally, we performed a univariate analysis, which also  
186 showed that scrub typhus case number was positively correlated with chigger species richness  
187 (Spearman rank correlation = 45.71,  $p = 0.0006$ ; Fig. 4a) and negatively correlated with host-chigger  
188 network connectance (Spearman's rank correlation = 485.45,  $p = 0.011$ ; Fig. 4b). Importantly, there  
189 was no significant relationship between overall chigger abundance and scrub typhus incidence ( $R^2 =$   
190  $0.105$ ,  $P = 0.732$ ; data not shown).

#### 191 *Microbiome of individual and pooled chigger specimens*

192 The total number of 16S rRNA reads from the complete set of 366 samples (264 individual chiggers,  
193 69 pooled chiggers, 18 soil samples and 15 background controls) after quality filtering, de-  
194 multiplexing and error correction was 51 896 654 (mean reads per sample = 137 657; SD = 69 522).  
195 After paired read alignment and size selection at 270 - 300 bp, the read number was 49 635 427  
196 (mean reads per sample = 131 659; SD = 69 922), a sequence retention of 94%. The analysis of  
197 individual chigger specimens comprised nine widespread species: *A. indica*, *L. deliense*, *W.*  
198 *micropelta*, *W. minuscuta*, *Walchia kritochoeta*, *H. pilosa*, *H. kohlsi*, *Blankaartia acuscutellaris*, and  
199 *Schoengastiella ligula*. However, after removing samples with high similarity to negative controls  
200 (see Supplemental Materials and Methods), more than half (58.7%) were excluded from  
201 downstream analyses, including all of those for *W. minuscuta*.

202 The microbiomes of individual chiggers were dominated by several different *Geobacillus* OTUs (Fig.  
203 5). However, *Sphingobium* ( $\alpha$ -Proteobacteria) was also abundant, as were Comamonadaceae  
204 (especially in *Walchia* spp.) and *Brevibacillus* (particularly in *B. acuscutellaris* and *L. deliense*).  
205 Importantly, we only detected *O. tsutsugamushi* in *L. deliense* (3/39 individual specimens that  
206 passed QC), with a maximum OTU proportion of 19.58% (Fig. 5; Table 1). Other bacteria with  
207 pathogenic potential in humans were found across several chigger species, including *Mycobacterium*  
208 (11.93% of specimens), *Staphylococcus* (8.25%) and *Haemophilus parainfluenzae* (7.34%) (Table 1).  
209 However, most arthropod symbionts known to be of importance in other mite species or in insects

210 (*Cardinium*, *Pseudonocardia* and *Rickettsiella*) were rare (<2% prevalence), while *Wolbachia*  
211 remained undetected at the individual level (Table 1).

212 To mitigate the problem of low biomass when amplifying 16S rRNA fragments from individual  
213 chiggers, we also sequenced several pools of 50 specimens each for *A. indica*, *L. deliense*, *W.*  
214 *micropelta*, *W. minuscula*, and *Blankaartia acuscutellaris* (Fig. 6a); as well as three mixed-species  
215 pools of 50 specimens each for all 11 Thai provinces (Fig. 6b). This strategy was successful, as fewer  
216 samples (7.2%) were removed due to high similarity with negative controls when compared with  
217 individual samples. Surprisingly, two OTUs (*Geobacillus* and *Brevibacillus*) that were highly prevalent  
218 and relatively abundant in the individual-level data were not present at a read count  $\geq 5$  in any of the  
219 pooled data (Table 1). For some of the potential pathogens, individual and pooled data showed good  
220 concordance (*Staphylococcus* and *Mycobacterium* detected in 95.38% and 73.85% of pools,  
221 respectively), whereas others that were rarely detected in individuals were robustly confirmed by  
222 the pooling strategy (*Borrelia* in 49.23% and *Corynebacterium* in 78.46% of pools, respectively)  
223 (Table 1). Pooling also provided additional evidence that three classical arthropod symbionts  
224 (*Cardinium*, *Pseudonocardia* and *Rickettsiella*) were present in chiggers (~20 – 45% of pools), while a  
225 fourth (*Wolbachia*) was present only in two (3.08%) pools (Table 1). Intriguingly, one *Neisseriaceae*  
226 OTU (933546) was detected in 95.38% of pooled samples and was particularly dominant in *L.*  
227 *deliense*, reaching a maximum OTU proportion of 92.48% (Table 1). In accordance with the individual  
228 chigger data, the 13 (20%) pooled samples positive for *O. tsutsugamushi* (Table 1) all contained *L.*  
229 *deliense*.

230 To investigate whether the presence of *Geobacillus* might have resulted from contamination of  
231 samples with spores in the laboratory or with bacterial DNA in the extraction kits, we first examined  
232 OTUs sequenced from negative controls, then measured levels of Firmicutes 16S rDNA by qPCR in  
233 chiggers compared with samples from the laboratory water bath. The dominant *Geobacillus* OTU  
234 observed in individual chiggers was absent in background controls (Table 1; Table S9). Despite a high

235 Firmicutes signal in the water bath (Fig. S4), Sanger sequencing revealed that this was derived from  
236 *Paenibacillus* spp. and related *Bacillales*, whereas *Geobacillus* spp. were only observed in individual  
237 chigger samples (Fig. S5). Finally, we calculated percent GC content for the 15 most abundant OTUs  
238 in individual specimens and the 26 most abundant OTUs in pooled samples. This showed that the GC  
239 content of the OTUs from individual specimens was significantly higher than for the pooled material  
240 ( $P = 0.0094$ ; Fig. S6).

#### 241 *Factors affecting the microbial profile of chiggers*

242 The  $\alpha$ -diversity of bacterial OTUs determined by a richness estimator (Chao1) and the whole-tree  
243 phylogenetic diversity index (PD\_whole\_tree) revealed significant differences between the sample  
244 types, with pooled chigger and soil samples exhibiting higher diversity than individual chigger  
245 specimens (Kruskal-Wallis test with post-hoc Bonferroni correction,  $P < 0.001$ ) (Table S10). The latter  
246 were not significantly more diverse than control samples. Analysis of  $\beta$ -diversity showed that the  
247 sample types were generally well separated from one another (ANOSIM:  $R = 0.7997$ ,  $P = 0.001$ ),  
248 although some background controls were nested on the periphery of the individual chigger samples  
249 (Fig. S7). Bacterial communities were significantly clustered with respect to chigger species and  
250 geographic location (study sites) in both individual and pooled chiggers ( $P < 0.001$ ), whereas habitat  
251 (human disturbance transect) failed to show a significant effect (Fig. 7). The impact of chigger  
252 species and geographic location on  $\beta$ -diversity displayed similar correlation coefficients and network  
253 topology (Fig. 7).

#### 254 **Discussion**

255 To the best of our knowledge, habitat type, chigger diversity and human scrub typhus incidence have  
256 never been analysed together on a countrywide scale before. The current study sampled more than  
257 one-third of known chigger species in Thailand [13] and found three significant environmental  
258 associations with species richness: a positive correlation with latitude, a negative correlation with

259 increased human land use, and an elevated level of chigger diversity in the dry season (in addition to  
260 significant effects of host species and maturity). Latitudinal gradients are associated with bioclimatic  
261 factors such as mean temperature, humidity and rainfall, and the species richness of animals and  
262 plants tends to increase at lower latitudes approaching the equator [34-36]. Thus, parasite diversity  
263 might also be expected to be higher at lower latitudes, and there is some evidence of this for  
264 microbial pathogens [37-39]. However, the opposite trend observed here is supported by previous  
265 studies on fleas [40]. Moreover, in Yunnan province in China, chigger diversity on small mammals  
266 was even higher than in our study and increased according to latitude up to a zenith at 25 - 26°N  
267 before decreasing further north [41], suggesting the presence of an optimum zone (our study  
268 covered 7 – 19°N). One hypothesis to explain this phenomenon is that the geographic range of  
269 individual hosts tends to be broader at higher latitudes, perhaps facilitating the accumulation of a  
270 greater diversity of ectoparasites [36].

271 Analysis of chigger distributions in Yunnan also concur with our findings on the impact of human  
272 disturbance of the natural environment, with a significantly greater host and chigger species richness  
273 being observed in a mountainous uncultivated landscape habitat compared with a cultivated flatland  
274 landscape [42]. We increased the resolution of the human land use analysis in our study by trapping  
275 hosts across a transect of four rather than two habitat categories, which revealed a stepwise  
276 reduction in chigger species richness as human disturbance increased, reflecting the universal  
277 process of loss of animal and plant diversity through urbanisation. Seasonality was also an apparent  
278 determinant of chigger diversity in our study, with a striking increase in species richness during the  
279 dry season compared with the wet season. However, caution is required in interpreting this finding,  
280 as our field studies were not designed to standardise sampling across the two seasons. Nevertheless,  
281 it is plausible that breeding frequency is reduced in the wet season, and/or that many chiggers  
282 emerging from underground during monsoon periods are washed into water bodies before they can  
283 attach to a host. Chigger species also have different seasonal preferences. For instance, in  
284 subtropical regions, most scrub typhus cases occur in the autumn when populations of

285 *Leptotrombidium pallidum* and *Leptotrombidium scutellare* dramatically increase (as seen in South  
286 Korea [43, 44]), or the main vector may change between summer and winter (as seen with *L.*  
287 *deliense* and *L. scutellare* in Taiwan, respectively [45]).

288 Here, the species richness of chiggers was identified as a positive correlate of scrub typhus incidence  
289 for the first time. Since decreased human land use is associated with both increased chigger species  
290 richness (this study) and higher prevalence of *O. tsutsugamushi* infection in small mammals [12],  
291 increased biodiversity may be a risk factor for human scrub typhus. This contradicts a meta-analysis  
292 of chigger-host relationships in Yunnan, where a lower host and chigger diversity in cultivated  
293 flatland was associated with a greater abundance of chiggers, especially species that are known or  
294 potential vectors of scrub typhus [42]. However, as neither human scrub typhus incidence nor *O.*  
295 *tsutsugamushi* prevalence in small mammals was incorporated into the Yunnan study, and an  
296 efficient scrub typhus vector (*L. scutellare*) was abundant in mountainous uncultivated land (the  
297 higher biodiversity site), the impact of land use on infection risk remains an open question in that  
298 region. In Taiwan, spatial modelling of land use data revealed significant positive correlations  
299 between crop-vegetation mosaics and forest, as well as elevation, with scrub typhus incidence [46].

300 In contrast with our study, follow-up investigations in Taiwan found that chigger prevalence and  
301 abundance on small mammals was positively associated with both human scrub typhus incidence  
302 and host *O. tsutsugamushi* seropositivity [45]. Chigger species richness and host-chigger networks  
303 were not explicitly incorporated in this Taiwanese study, but both the diversity of chiggers (12  
304 species) and their hosts (8 species) were markedly lower than we observed in Thailand.

305 At first glance, the association between chigger species richness and scrub typhus incidence in  
306 Thailand seems paradoxical as we only detected *O. tsutsugamushi* in a single species (*L. deliense*).  
307 Yet it is important to emphasise that other potential vectors of scrub typhus (e.g., *L. imphalum*, the  
308 principal vector in northern Thailand [47]) were collected but not subjected to 16S rRNA sequencing.  
309 Moreover, more than 20 species of *Leptotrombidium* have been reported from Thailand, many only

310 from the northern provinces where scrub typhus incidence is highest [13]. Although the majority of  
311 these species are not known to be scrub typhus vectors, recent data on vector competence are  
312 lacking, and it is plausible that transmission of *O. tsutsugamushi* by two or more vectors in the same  
313 region may contribute to diversification of the pathogen and an increase in human cases, as has  
314 been recently hypothesised for Taiwan [45, 48]. We also observed that human scrub typhus  
315 incidence was negatively associated with host-parasite network connectance, suggesting that  
316 increasing complexity of chigger-host interactions might reduce human exposure by zoophylaxis,  
317 or lead to a greater likelihood that non-vector species dominate networks.

318 With the exception of a laboratory colony of *L. imphalum* [10], the composition of the chigger  
319 microbiome was largely unknown prior to our study. Our data reveal complex microbiomes that (in  
320 contrast with those of many other arthropods such as certain vectors [49] or sap-feeding insects  
321 [50]) are not dominated by a very small number of specialised primary and secondary symbionts.  
322 Since questing chiggers emerge from underground and are associated with their host for only few  
323 days before moulting into free-living nymphs, we hypothesised that they may not require symbionts  
324 for dietary supplementation, and may passively accumulate soil microbes instead. Indeed, it is now  
325 known that the *L. deliense* genome contains terpene synthase genes that appear to have been  
326 acquired by ancient lateral gene transfer from Actinobacteria and other environmental phyla [11].  
327 However, while bacterial sequences of putative soil origin were prevalent in chiggers (*e.g.*, *Bacillus*  
328 *cereus* and *Mycobacterium* spp.), on the basis of the limited number of soil samples we analysed  
329 here, the chigger “microbiome” is not simply a result of soil particles adhering to the mite surface.  
330 The clear impact of chigger species and geographical location, but not human land disturbance, on  
331 the microbial sequence profiles lends further support to the concept of an integral microbiome in  
332 chiggers that may be modulated by habitat on large (several hundred km) but not small (a few km)  
333 scales. This may be because their mobile hosts can travel between the human disturbance zones we  
334 defined within sampling sites [16, 51]. Evidence that the host also contributes to the chigger

335 microbiome was revealed by the presence of typical mammalian-associated flora such as  
336 *Staphylococcus* spp. and *Haemophilus* spp.

337 The prevalence of the classical intracellular arthropod symbionts *Cardinium*, *Rickettsiella* and  
338 *Wolbachia* was quite low in individual specimens, despite their importance in other mite taxa [52].

339 While *Orientia* in some *Leptotrombidium* spp. could conceivably displace these symbionts due to  
340 competition for intracellular niches, it is rare or absent in most other chigger genera [53].

341 Unfortunately, the sample size of *Orientia*-infected chiggers was too small in this study to investigate  
342 the impact of the pathogen on microbiome composition. In contrast to a recent analysis of the

343 microbiome of colonised *L. imphalum*, we found no evidence for an abundant *Amoebophilaceae*  
344 OTU; although this is not surprising, as it was found to be uncommon in all life stages except

345 *Orientia*-infected adult females [10], and neither this species nor life stage was included in our  
346 microbiome analysis. Future studies should consider the role of *Neisseriaceae* OTU 933546 in chigger

347 biology and potential interactions with vectored pathogens. Notably, this family in the  $\beta$ -  
348 proteobacteria exhibited a moderate prevalence in *L. deliense* individuals and contains gut

349 symbionts of bees (*Snodgrassella alvi* [54]) and termites (*Stenoxybacter acetivorans* [55]). This  
350 suggests a facultative relationship in *L. deliense*, especially as OTU 933546 was also found in almost

351 30% of soil samples.

352 The high prevalence of sequences from *Geobacillus* spp. was surprising, since this is a thermophilic,  
353 spore-forming genus with an optimal growth range of 45 - 70°C. *Geobacillus* spp. thrive in hot

354 composts, subterranean oilfields and hydrothermal vents, but due to their exceedingly robust spores  
355 that can be transported worldwide in atmospheric currents, isolates have been obtained across a

356 vast range of temperate or cold terrestrial and marine sediments [56]. We did not surface-sterilise  
357 the chiggers as there is no evidence this procedure significantly affects microbiome data obtained

358 from arthropods [57], and the risk of degradation of internal DNA when dealing with soft, minute  
359 species that might exhibit small breaches in their exoskeleton was acute. In any case, the dominant



360 *Geobacillus* OTU detected in individual chiggers was absent from the soil we analysed. Despite the  
361 potential ubiquity of *Geobacillus* spp. spores in the environment, it is intriguing that this genus is not  
362 observed more frequently in arthropod microbiomes. In addition to aphids [58] and ants [59],  
363 *Geobacillus* spp. sequences have been reported from sandflies [60], mosquitoes [61] and ticks [62].  
364 In mosquitoes, *Geobacillus* spp. were identified as part of the core microbiome of dissected  
365 reproductive tracts [61]; whereas in the tick *Dermacentor occidentalis*, it was associated with a  
366 greater abundance of *Francisella* relative to *Rickettsia* [62]. These findings indicate that although the  
367 genus *Geobacillus* is assumed to be exclusively thermophilic, it may have a potential biological role in  
368 disease vectors, suggesting that some strains may actually be mesophilic.

369 The high prevalence of *Geobacillus* sequences in our individual, but not pooled, chigger data raised  
370 important questions about both reagent contamination with bacterial DNA and amplification biases  
371 caused by variation in GC content. Several recent studies have highlighted the pitfalls of microbiome  
372 studies on low biomass samples, where bacterial DNA present in molecular biology reagents  
373 competes very effectively as PCR template with bacterial DNA from the sample itself [63, 64]. Since  
374 DNA from more than 180 environmental bacterial genera has been detected in commercially  
375 available DNA extraction kits [64], assessing the true impact of laboratory contamination on the  
376 ensuing data is extremely challenging. The conservative approach that we used here for the  
377 individual chiggers was effective, but led to exclusion of more than half of these samples from  
378 downstream analyses.

379 Pooling appears to be an obvious solution to the problem of low biomass samples [65], but is not  
380 without its own drawbacks. Genomic GC content is now well known as a source of bias in 16S rRNA  
381 datasets, with higher GC content leading to underrepresentation [66], as we observed here with  
382 *Geobacillus* spp. (relatively high median GC of ~52%) in pooled samples. At lower template  
383 concentrations, denaturation of DNA appears to have been more efficient, revealing OTUs that  
384 would have remained hidden had we only sequenced pools.

385 **Conclusion**

386 This study emphasises that among human disease vectors, chiggers exhibit some of the most  
387 complex ecological relationships [67], with high species diversity and low host specificity  
388 contributing to elevated rates of coinfection on individual mammalian hosts. The diverse  
389 microbiomes of chiggers add a further layer to the network of potential interactions that *Orientia* is  
390 exposed to, and future studies should determine whether some of these commensal bacteria affect  
391 chigger vector competence. Moreover, the positive correlation we identified here between chigger  
392 species richness and scrub typhus incidence deserves further investigation in other endemic  
393 countries, especially in relation to the epidemiology of *Orientia* strain diversity [48].

394

395 **Acknowledgments**

396 The lead author (KC) was supported by the Mahidol-Liverpool Chamlong Harinasuta PhD Scholarship  
397 scheme. Field studies were funded by French Agence Nationale de la Recherche grants ANR-07-  
398 BDIV-012 (“CERoPath”) and ANR-11-CPEL-002 (“BiodivHealthSEA”) projects to SM, who was also  
399 supported by the award “FutureHealthSEA” (ANR-17-CE35-0003). We thank Sabine Dittrich (Lao-  
400 Oxford-Mahosot Hospital Wellcome Trust Research Unit) for supplying soil samples from Laos.

401 **Conflicts of interest**

402 None.

403 **Figure 1:** Effect of habitat and season on chigger species richness. (A) Chigger species accumulation  
404 curves among different habitats at the host population level. (B) Mean chigger species richness per  
405 host individual by habitat type. (C) Chigger species accumulation curves between the dry (red) and  
406 wet (blue) season.

407 **Figure 2** Correspondence analysis showing the association between the 12 dominant chigger species  
408 (Aind, *Ascoschoengastia indica*; Bacu, *Blankartia acuscutellaris*; Hkoh, *Helenicula kohlsi*; Hpil,  
409 *Helenicula pilosa*; Ldel, *Leptotrombidium deliense*; Slig, *Schoengastiella ligula*; Wdis, *Walchia*  
410 *dismina*; Wkri, *Walchia kritochoeta*; Wmic, *Walchia micropelta*; Wmin, *Walchia minuscuta*; Wpin,  
411 *Walchia pingue*; Wrus, *Walchia rustica*) within the four categorized habitats. The first and second  
412 dimensions explain 87% of the total variance (axis 1, 59.82%; axis 2, 27.38%).

413 **Figure 3** Host-chigger associations in Thailand. (A) Bipartite graph based on presence-absence data.  
414 The number of individual hosts examined is shown in parentheses. Chigger species with broad  
415 host ranges are displayed in bold. (B) Unipartite network and Eigenvector centrality scores  
416 illustrating the pattern of chigger sharing among 18 small mammal hosts.

417 **Figure 4** Correlation plots show the relationship between chigger ecology [(A) chigger species  
418 richness; (B) host-chigger network connectance] and scrub typhus incidence in humans. Incidence  
419 data are displayed as the  $\log_{10}$  transformation of the number of cases per year.

420 **Figure 5** Relative abundance of bacterial OTUs in background controls and individual chiggers. (A)  
421 subfamily Gahrlepiinae and subfamily Trombiculinae. (B) Tribe Schoengastiini. (C) Tribe  
422 Trombiculini. The data are filtered; OTUs that represented <10% in a sample were combined in  
423 “others” (light grey) to aid visualisation. Source data are included in Table S11.

424 **Figure 6** Relative abundance of bacterial OTUs in background controls and pooled samples. (A) Pools  
425 by chigger species (50 individuals per sample). (B) Mixed chigger species (50 individuals per sample)

426 pooled by province. The data are filtered; OTUs that represented <10% in a sample were combined  
427 in “others” (light grey) to aid visualisation. Source data are included in Table S11

428 **Figure 7** Principal coordinates analysis plots created using the unweighted UniFrac metric showing  
429 bacterial community clustering of individual (left panels) and pooled chiggers (right panels) among  
430 different sample categories. (A, B) chigger species; (C, D) habitat; and (E, F) study site. Control data  
431 are shown for reference only and were not included in the ANOSIM.

432

433 **Table 1.** Selected bacterial taxa of public health importance, potential symbionts, and other prevalent OTUs detected in individual and pooled  
 434 chiggers in comparison to soils and background controls. Only the OTUs with  $\geq 5$  reads were included. Superscript “1” or “P” indicate maximum  
 435 OTU proportion values from individual or pooled chiggers, respectively.

| Bacterial taxa (OTU identifier)                   | Maximum            | Individual chigger   |                      | Pooled chigger       |                      | Soil                 |                      | Control              |                      |
|---------------------------------------------------|--------------------|----------------------|----------------------|----------------------|----------------------|----------------------|----------------------|----------------------|----------------------|
|                                                   | OTU Proportion (%) | Positive samples (%) | Positive samples (%) | Positive samples (%) | Positive samples (%) | Positive samples (%) | Positive samples (%) | Positive samples (%) | Positive samples (%) |
| <b>Opportunistic/Potential pathogens</b>          |                    |                      |                      |                      |                      |                      |                      |                      |                      |
| <i>Bacillus cereus</i> (4463224)                  | 1.63 <sup>P</sup>  | 4                    | (3.67)               | 31                   | (47.69)              | 11                   | (61.11)              | -                    | -                    |
| <i>Borrelia</i> (New.ReferenceOTU7)               | 34.82 <sup>P</sup> | 1                    | (0.92)               | 32                   | (49.23)              | -                    | -                    | -                    | -                    |
| <i>Campylobacter</i> (New.CleanUp.ReferenceOTU30) | 1.49 <sup>P</sup>  | -                    | -                    | 3                    | (4.62)               | -                    | -                    | -                    | -                    |
| <i>Clostridium</i> (New.ReferenceOTU2470)         | 3.43 <sup>P</sup>  | -                    | -                    | 6                    | (9.23)               | -                    | -                    | -                    | -                    |
| <i>Corynebacterium</i> (13485)                    | 16.36 <sup>P</sup> | 7                    | (6.42)               | 65                   | (100)                | -                    | -                    | 2                    | (13.33)              |

|                                                  |                    |            |            |           |           |
|--------------------------------------------------|--------------------|------------|------------|-----------|-----------|
| <i>Fusobacterium</i> (2438396)                   | 2.44 <sup>P</sup>  | 1 (0.92)   | 6 (9.23)   | - -       | - -       |
| <i>Haemophilus parainfluenzae</i> (4473129)      | 1.83 <sup>I</sup>  | 8 (7.34)   | 17 (26.15) | - -       | 1 (6.67)  |
| <i>Moraxella</i> (1127280)                       | 1.63 <sup>P</sup>  | - -        | 4 (6.15)   | - -       | - -       |
| <i>Mycobacterium</i> (4448095)                   | 5.22 <sup>P</sup>  | 13 (11.93) | 48 (73.85) | 18 (100)  | - -       |
| <i>Nocardia</i> (102163)                         | 17.41 <sup>P</sup> | 5 (4.58)   | 35 (53.84) | 1 (5.55)  | - -       |
| <i>Orientia tsutsugamushi</i> (301131)           | 19.57 <sup>I</sup> | 3 (2.75)   | 13 (20)    | - -       | - -       |
| <i>Staphylococcus</i> (4446058)                  | 55.99 <sup>I</sup> | 67 (61.47) | 65 (100)   | 3 (16.66) | 6 (40)    |
| <b>Potential arthropod symbionts</b>             |                    |            |            |           |           |
| <i>Candidatus Cardinium</i> (New.ReferenceOTU10) | 19.06 <sup>P</sup> | 2 (1.83)   | 18 (27.69) | - -       | - -       |
| <i>Neisseriaceae</i> (933546)                    | 92.48 <sup>P</sup> | 18 (16.51) | 62 (95.38) | 5 (27.78) | 4 (26.67) |
| <i>Rickettsiella</i> (8028)                      | 1.12 <sup>P</sup>  | 2 (1.83)   | 12 (18.46) | - -       | - -       |
| <i>Wolbachia</i> (New.ReferenceOTU2936)          | 2.32 <sup>P</sup>  | - -        | 2 (3.08)   | - -       | - -       |

| Other prevalent OTUs                         |                    |    |         |    |         |   |          |
|----------------------------------------------|--------------------|----|---------|----|---------|---|----------|
| <i>Acinetobacter rhizosphaerae</i> (4334053) | 6.13 <sup>p</sup>  | 4  | (3.67)  | 33 | (50.77) | - | -        |
| <i>Brevibacillus</i> (3307468)               | 60.37 <sup>l</sup> | 61 | (55.96) | -  | -       | - | -        |
| <i>Burkholderia bryophila</i> (4320353)      | 1.27 <sup>l</sup>  | 38 | (34.86) | 2  | (3.07)  | - | -        |
| <i>Geobacillus</i> (New.ReferenceOTU5884)    | 10.73 <sup>l</sup> | 82 | (75.23) | -  | -       | - | -        |
| <i>Nevskia</i> (516554)                      | 2.06 <sup>l</sup>  | 27 | (24.77) | 3  | (4.61)  | 7 | (38.88)  |
| <i>Sphingobacterium multivorum</i> (4423201) | 1.16 <sup>l</sup>  | 44 | (40.36) | 15 | (23.07) | - | 1 (6.67) |
| <i>Sphingobium</i> (4393057)                 | 14.69 <sup>l</sup> | 82 | (75.23) | 11 | (16.92) | 1 | (5.55)   |
| <i>Streptomyces</i> (821185)                 | 59.26 <sup>l</sup> | 2  | (1.83)  | 13 | (20)    | 1 | (5.55)   |
| <i>Methylobacterium adhaesivum</i> (4303249) | 3.96 <sup>l</sup>  | 11 | (10.09) | 12 | (18.46) | - | -        |

436

## References

437

438 1. Shatrov AB, Kudryashova, N.I., *Taxonomy, life cycles and the origin of parasitism in*  
439 *trombiculid mites, in Micromammals and Macroparasites: From Evolutionary Ecology to*  
440 *Management*, S. Morand, Krasnov, B.R, Poulin, R, Editor. 2006, Springer Japan: Tokyo. p.  
441 119-40.

442 2. Bonell A, Lubell Y, Newton PN, Crump JA, Paris DH. Estimating the burden of scrub typhus: A  
443 systematic review. *PLoS Negl Trop Dis*. 2017;11:e0005838. 10.1371/journal.pntd.0005838

444 3. Izzard L, Fuller A, Blacksell SD, Paris DH, Richards AL, Aukkanit N, et al. Isolation of a novel  
445 *Orientia* species (*O. chuto* sp. nov.) from a patient infected in Dubai. *J Clin Microbiol*.  
446 2010;48:4404-9. 10.1128/JCM.01526-10

447 4. Weitzel T, Dittrich S, Lopez J, Phuklia W, Martinez-Valdebenito C, Velasquez K, et al. Endemic  
448 Scrub Typhus in South America. *N Engl J Med*. 2016;375:954-61. 10.1056/NEJMoa1603657

449 5. Masakhwe C, Linsuwanon P, Kimita G, Mutai B, Leepitakrat S, Yalwala S, et al. Identification  
450 and Characterization of *Orientia chuto* in Trombiculid Chigger Mites Collected from Wild  
451 Rodents in Kenya. *J Clin Microbiol*. 2018;56. 10.1128/JCM.01124-18

452 6. Takahashi M, Urakami H, Yoshida Y, Furuya Y, Misumi H, Hori E, et al. Occurrence of high  
453 ratio of males after introduction of minocycline in a colony of *Leptotrombidium fletcheri*  
454 infected with *Orientia tsutsugamushi*. *Eur J Epidemiol*. 1997;13:79-86.

455 7. Kumlert R, Chaisiri K, Anantatat T, Stekolnikov AA, Morand S, Prasartvit A, et al.  
456 Autofluorescence microscopy for paired-matched morphological and molecular  
457 identification of individual chigger mites (Acari: Trombiculidae), the vectors of scrub typhus.  
458 *PLoS One*. 2018;13:e0193163. 10.1371/journal.pone.0193163

459 8. Kabeya H, Colborn JM, Bai Y, Lerdthusnee K, Richardson JH, Maruyama S, et al. Detection of  
460 *Bartonella tamiae* DNA in Ectoparasites from Rodents in Thailand and Their Sequence  
461 Similarity with Bacterial Cultures from Thai Patients. *Vector-Borne and Zoonotic Diseases*.  
462 2010;10:429-34.

463 9. Huang Y, Zhao L, Zhang Z, Liu M, Xue Z, Ma D, et al. Detection of a Novel *Rickettsia* From  
464 *Leptotrombidium scutellare* Mites (Acari: Trombiculidae) From Shandong of China. *J Med*  
465 *Entomol*. 2017;54:544-9. 10.1093/jme/tjw234

466 10. Ponnusamy L, Willcox AC, Roe RM, Davidson SA, Linsuwanon P, Schuster AL, et al. Bacterial  
467 microbiome of the chigger mite *Leptotrombidium imphalum* varies by life stage and  
468 infection with the scrub typhus pathogen *Orientia tsutsugamushi*. *PLoS One*.  
469 2018;13:e0208327. 10.1371/journal.pone.0208327



- 470 11. Dong X, Chaisiri K, Xia D, Armstrong SD, Fang Y, Donnelly MJ, et al. Genomes of trombidid  
471 mites reveal novel predicted allergens and laterally transferred genes associated with  
472 secondary metabolism. *Gigascience*. 2018;7. 10.1093/gigascience/giy127
- 473 12. Chaisiri K, Cosson JF, Morand S. Infection of Rodents by *Orientia tsutsugamushi*, the Agent of  
474 Scrub Typhus in Relation to Land Use in Thailand. *Trop Med Infect Dis*. 2017;2.  
475 10.3390/tropicalmed2040053
- 476 13. Chaisiri K, Stekolnikov AA, Makepeace BL, Morand S. A Revised Checklist of Chigger Mites  
477 (Acari: Trombiculidae) From Thailand, with the Description of Three New Species. *J Med*  
478 *Entomol*. 2016;53:321-42. 10.1093/jme/tjv244
- 479 14. Rozsa L, Reiczigel J, Majoros G. Quantifying parasites in samples of hosts. *Journal of*  
480 *Parasitology*. 2000;86:228-32. Doi 10.2307/3284760
- 481 15. Auffray JC, Blasdell KR, Bordes F, Chabé M, Chaisiri K, Charbonnel N, et al., *Protocols for field*  
482 *and laboratory rodent studies*, ed. V. Herbreteau, Jittapalapong, S., Rerkamnuaychoke, W.,  
483 Chaval, Y., Cosson, J.F. 2011, Bangkok: Kasetsart University Press.
- 484 16. Blasdell K, Bordes F, Chaisiri K, Chaval Y, Claude J, Cosson JF, et al. Progress on research on  
485 rodents and rodent-borne zoonoses in South-east Asia. *Wildlife Research*. 2015;42:98-107.  
486 doi.org/10.1071/WR14201
- 487 17. Chaisiri K, Siribat P, Ribas A, Morand S. Potentially zoonotic helminthiasis of murid rodents  
488 from the Indo-Chinese peninsula: impact of habitat and the risk of human infection. *Vector*  
489 *Borne Zoonotic Dis*. 2015;15:73-85. 10.1089/vbz.2014.1619
- 490 18. Oksanen J, Blanchet FG, Friendly M, Kindt R, Legendre P, McGlinn D, et al. *vegan: Community*  
491 *Ecology Package*. 2015. <http://cran.r-project.org/package=vegan> Accessed: 24/12/2018.
- 492 19. Dormann CF, Fründ J, Blüthgen N, Gruber B. Indices, graphs and null Models: Analyzing  
493 bipartite ecological networks. *The Open Ecology Journal*. 2009;2:7-24.  
494 10.2174/1874213000902010007
- 495 20. Opsahl T. *tnet: Software for analysis of weighted, two-mode, and longitudinal networks*.  
496 2015. <https://cran.r-project.org/package=tnet> Accessed: 24/12/2018.
- 497 21. Bates D, Machler M, Bolker BM, Walker SC. Fitting Linear Mixed-Effects Models Using lme4.  
498 *Journal of Statistical Software*. 2015;67:1-48.
- 499 22. Calcagno V, de Mazancourt C. *glmulti: An R Package for Easy Automated Model Selection*  
500 *with (Generalized) Linear Models*. *Journal of Statistical Software*. 2010;34:1-29.

- 501 23. Caporaso JG, Lauber CL, Walters WA, Berg-Lyons D, Lozupone CA, Turnbaugh PJ, et al. Global  
502 patterns of 16S rRNA diversity at a depth of millions of sequences per sample. *Proc Natl*  
503 *Acad Sci U S A*. 2011;108 Suppl 1:4516-22. 10.1073/pnas.1000080107
- 504 24. Kozich JJ, Westcott SL, Baxter NT, Highlander SK, Schloss PD. Development of a dual-index  
505 sequencing strategy and curation pipeline for analyzing amplicon sequence data on the  
506 MiSeq Illumina sequencing platform. *Appl Environ Microbiol*. 2013;79:5112-20.  
507 10.1128/AEM.01043-13
- 508 25. Anonymous. 16S Metagenomic Sequencing Library Preparation. 2013, Illumina, Inc., 28 pp.  
509 [http://emea.support.illumina.com/downloads/16s\\_metagenomic\\_sequencing\\_library\\_preparation.html?langsel=/gb/](http://emea.support.illumina.com/downloads/16s_metagenomic_sequencing_library_preparation.html?langsel=/gb/) Accessed: 24/12/2018.  
510
- 511 26. Caporaso JG, Kuczynski J, Stombaugh J, Bittinger K, Bushman FD, Costello EK, et al. QIIME  
512 allows analysis of high-throughput community sequencing data. *Nat Methods*. 2010;7:335-6.  
513 10.1038/nmeth.f.303
- 514 27. Edgar RC. Search and clustering orders of magnitude faster than BLAST. *Bioinformatics*.  
515 2010;26:2460-1. 10.1093/bioinformatics/btq461
- 516 28. McDonald D, Price MN, Goodrich J, Nawrocki EP, DeSantis TZ, Probst A, et al. An improved  
517 Greengenes taxonomy with explicit ranks for ecological and evolutionary analyses of  
518 bacteria and archaea. *ISME J*. 2012;6:610-8. 10.1038/ismej.2011.139
- 519 29. Haas BJ, Gevers D, Earl AM, Feldgarden M, Ward DV, Giannoukos G, et al. Chimeric 16S rRNA  
520 sequence formation and detection in Sanger and 454-pyrosequenced PCR amplicons.  
521 *Genome Res*. 2011;21:494-504. 10.1101/gr.112730.110
- 522 30. Wang Q, Garrity GM, Tiedje JM, Cole JR. Naive Bayesian classifier for rapid assignment of  
523 rRNA sequences into the new bacterial taxonomy. *Appl Environ Microbiol*. 2007;73:5261-7.  
524 10.1128/AEM.00062-07
- 525 31. Soergel DA, Dey N, Knight R, Brenner SE. Selection of primers for optimal taxonomic  
526 classification of environmental 16S rRNA gene sequences. *ISME J*. 2012;6:1440-4.  
527 10.1038/ismej.2011.208
- 528 32. Tamura K, Stecher G, Peterson D, Filipinski A, Kumar S. MEGA6: Molecular Evolutionary  
529 Genetics Analysis version 6.0. *Mol Biol Evol*. 2013;30:2725-9. 10.1093/molbev/mst197
- 530 33. Kibbe WA. OligoCalc: an online oligonucleotide properties calculator. *Nucleic Acids Res*.  
531 2007;35:W43-6. 10.1093/nar/gkm234

- 532 34. Lindenfors P, Nunn CL, Jones KE, Cunningham AA, Sechrest W, Gittleman JL. Parasite species  
533 richness in carnivores: effects of host body mass, latitude, geographical range and  
534 population density. *Global Ecology and Biogeography*. 2007;16:496–509.
- 535 35. Bordes F, Morand S, Krasnov BR, Poulin R, *Parasite diversity and latitudinal gradients in*  
536 *terrestrial mammals*, in *The Biogeography of Host-Parasite Interactions*, S. Morand and B.R.  
537 Krasnov, Editors. 2010, Oxford University Press: New York. p. 89-98.
- 538 36. Morand S. (macro-) Evolutionary ecology of parasite diversity: From determinants of  
539 parasite species richness to host diversification. *Int J Parasitol Parasites Wildl*. 2015;4:80-7.  
540 10.1016/j.ijppaw.2015.01.001
- 541 37. Guernier V, Hochberg ME, Guegan JF. Ecology drives the worldwide distribution of human  
542 diseases. *PLoS Biol*. 2004;2:e141. 10.1371/journal.pbio.0020141
- 543 38. Nunn CL, Altizer SM, Sechrest W, Cunningham AA. Latitudinal gradients of parasite species  
544 richness in primates. *Diversity and Distributions*. 2005;11:249–56.
- 545 39. Bordes F, Guégan JF, Morand S. Microparasite species richness in rodents is higher at lower  
546 latitudes and is associated with reduced litter size. *Oikos*. 2011;120:1889–96.
- 547 40. Krasnov BR, Shenbrot GI, Khokhlova IS, Degen AA. Flea species richness and parameters of  
548 host body, host geography and host 'milieu'. *Journal of Animal Ecology*. 2004;73:1121–8.
- 549 41. Peng PY, Guo XG, Ren TG, Song WY, Dong WG, Fan R. Species diversity of ectoparasitic  
550 chigger mites (Acari: Prostigmata) on small mammals in Yunnan Province, China. *Parasitol*  
551 *Res*. 2016;115:3605-18. 10.1007/s00436-016-5127-x
- 552 42. Peng PY, Guo XG, Jin DC, Dong WG, Qian TJ, Qin F, et al. Landscapes with different  
553 biodiversity influence distribution of small mammals and their ectoparasitic chigger mites: A  
554 comparative study from southwest China. *PLoS One*. 2018;13:e0189987.  
555 10.1371/journal.pone.0189987
- 556 43. Park GM, Shin HS. Geographical Distribution and Seasonal Indices of Chigger Mites on Small  
557 Mammals Collected on the East Coast of the Republic of Korea. *J Parasitol*. 2016;102:193-8.  
558 10.1645/15-760
- 559 44. Choi YJ, Lee IY, Song HJ, Kim J, Park HJ, Song D, et al. Geographical distribution of *Orientia*  
560 *tsutsugamushi* strains in chiggers from three provinces in Korea. *Microbiol Immunol*.  
561 2018;62:547-53. 10.1111/1348-0421.12639
- 562 45. Kuo CC, Lee PL, Chen CH, Wang HC. Surveillance of potential hosts and vectors of scrub  
563 typhus in Taiwan. *Parasit Vectors*. 2015;8:611. 10.1186/s13071-015-1221-7

- 564 46. Wardrop NA, Kuo CC, Wang HC, Clements AC, Lee PF, Atkinson PM. Bayesian spatial  
565 modelling and the significance of agricultural land use to scrub typhus infection in Taiwan.  
566 *Geospat Health*. 2013;8:229-39. 10.4081/gh.2013.69
- 567 47. Tanskul P, Linthicum KJ. Redescription of *Leptotrombidium* (*Leptotrombidium*) *imphalum*  
568 (*Acari*: *Trombiculidae*), with observations on bionomics and medical importance in northern  
569 Thailand. *J Med Entomol*. 1999;36:88-91.
- 570 48. Kim G, Ha NY, Min CK, Kim HI, Yen NT, Lee KH, et al. Diversification of *Orientia tsutsugamushi*  
571 genotypes by intragenic recombination and their potential expansion in endemic areas. *PLoS*  
572 *Negl Trop Dis*. 2017;11:e0005408. 10.1371/journal.pntd.0005408
- 573 49. Rio RV, Attardo GM, Weiss BL. Grandeur Alliances: Symbiont Metabolic Integration and  
574 Obligate Arthropod Hematophagy. *Trends Parasitol*. 2016;32:739-49.  
575 10.1016/j.pt.2016.05.002
- 576 50. Hansen AK, Moran NA. The impact of microbial symbionts on host plant utilization by  
577 herbivorous insects. *Mol Ecol*. 2014;23:1473-96. 10.1111/mec.12421
- 578 51. Morand S, Bordes F, Chen HW, Claude J, Cosson JF, Galan M, et al. Global parasite and  
579 *Rattus* rodent invasions: The consequences for rodent-borne diseases. *Integr Zool*.  
580 2015;10:409-23. 10.1111/1749-4877.12143
- 581 52. Chaisiri K, McGarry JW, Morand S, Makepeace BL. Symbiosis in an overlooked microcosm: a  
582 systematic review of the bacterial flora of mites. *Parasitology*. 2015;142:1152-62.  
583 10.1017/S0031182015000530
- 584 53. Traub R, Wisseman CL, Jr. Ecological considerations in scrub typhus. 2. Vector species. *Bull*  
585 *World Health Organ*. 1968;39:219-30.
- 586 54. Kwong WK, Moran NA. Cultivation and characterization of the gut symbionts of honey bees  
587 and bumble bees: description of *Snodgrassella alvi* gen. nov., sp. nov., a member of the  
588 family *Neisseriaceae* of the *Betaproteobacteria*, and *Gilliamella apicola* gen. nov., sp. nov., a  
589 member of *Orbaceae* fam. nov., *Orbales* ord. nov., a sister taxon to the order  
590 'Enterobacteriales' of the *Gammaproteobacteria*. *Int J Syst Evol Microbiol*. 2013;63:2008-18.  
591 10.1099/ijs.0.044875-0
- 592 55. Wertz JT, Breznak JA. *Stenoxybacter acetivorans* gen. nov., sp. nov., an acetate-oxidizing  
593 obligate microaerophile among diverse O<sub>2</sub>-consuming bacteria from termite guts. *Appl*  
594 *Environ Microbiol*. 2007;73:6819-28. 10.1128/AEM.00786-07
- 595 56. Zeigler DR. The *Geobacillus* paradox: why is a thermophilic bacterial genus so prevalent on a  
596 mesophilic planet? *Microbiology*. 2014;160:1-11. 10.1099/mic.0.071696-0

- 597 57. Hammer TJ, Dickerson JC, Fierer N. Evidence-based recommendations on storing and  
598 handling specimens for analyses of insect microbiota. *PeerJ*. 2015;3:e1190.  
599 10.7717/peerj.1190
- 600 58. Jouselin E, Clamens AL, Galan M, Bernard M, Maman S, Gschloessl B, et al. Assessment of a  
601 16S rRNA amplicon Illumina sequencing procedure for studying the microbiome of a  
602 symbiont-rich aphid genus. *Mol Ecol Resour*. 2016;16:628-40. 10.1111/1755-0998.12478
- 603 59. Seipke RF, Barke J, Heavens D, Yu DW, Hutchings MI. Analysis of the bacterial communities  
604 associated with two ant-plant symbioses. *Microbiologyopen*. 2013;2:276-83.  
605 10.1002/mbo3.73
- 606 60. McCarthy CB, Diambra LA, Rivera Pomar RV. Metagenomic analysis of taxa associated with  
607 *Lutzomyia longipalpis*, vector of visceral leishmaniasis, using an unbiased high-throughput  
608 approach. *PLoS Negl Trop Dis*. 2011;5:e1304. 10.1371/journal.pntd.0001304
- 609 61. Segata N, Baldini F, Pompon J, Garrett WS, Truong DT, Dabire RK, et al. The reproductive  
610 tracts of two malaria vectors are populated by a core microbiome and by gender- and  
611 swarm-enriched microbial biomarkers. *Sci Rep*. 2016;6:24207. 10.1038/srep24207
- 612 62. Gurfield N, Grewal S, Cua LS, Torres PJ, Kelley ST. Endosymbiont interference and microbial  
613 diversity of the Pacific coast tick, *Dermacentor occidentalis*, in San Diego County, California.  
614 *PeerJ*. 2017;5:e3202. 10.7717/peerj.3202
- 615 63. Salter SJ, Cox MJ, Turek EM, Calus ST, Cookson WO, Moffatt MF, et al. Reagent and  
616 laboratory contamination can critically impact sequence-based microbiome analyses. *BMC*  
617 *Biol*. 2014;12:87. 10.1186/s12915-014-0087-z
- 618 64. Glassing A, Dowd SE, Galandiuk S, Davis B, Chiodini RJ. Inherent bacterial DNA contamination  
619 of extraction and sequencing reagents may affect interpretation of microbiota in low  
620 bacterial biomass samples. *Gut Pathog*. 2016;8:24. 10.1186/s13099-016-0103-7
- 621 65. Kennedy K, Hall MW, Lynch MD, Moreno-Hagelsieb G, Neufeld JD. Evaluating bias of  
622 illumina-based bacterial 16S rRNA gene profiles. *Appl Environ Microbiol*. 2014;80:5717-22.  
623 10.1128/AEM.01451-14
- 624 66. Laursen MF, Dalgaard MD, Bahl MI. Genomic GC-Content Affects the Accuracy of 16S rRNA  
625 Gene Sequencing Based Microbial Profiling due to PCR Bias. *Front Microbiol*. 2017;8:1934.  
626 10.3389/fmicb.2017.01934
- 627 67. Traub R, Wisseman CL, Jr. The ecology of chigger-borne rickettsiosis (scrub typhus). *J Med*  
628 *Entomol*. 1974;11:237-303.
- 629

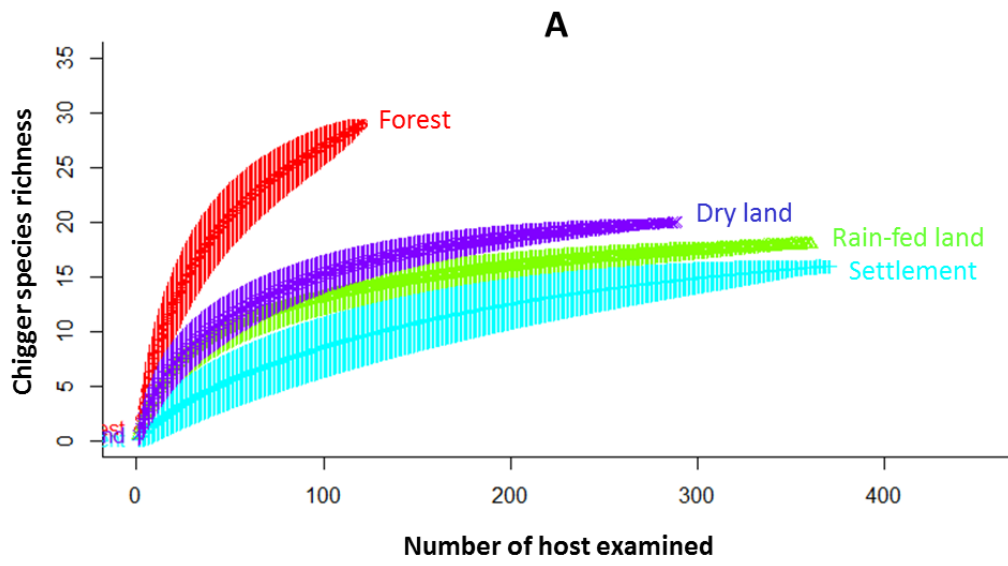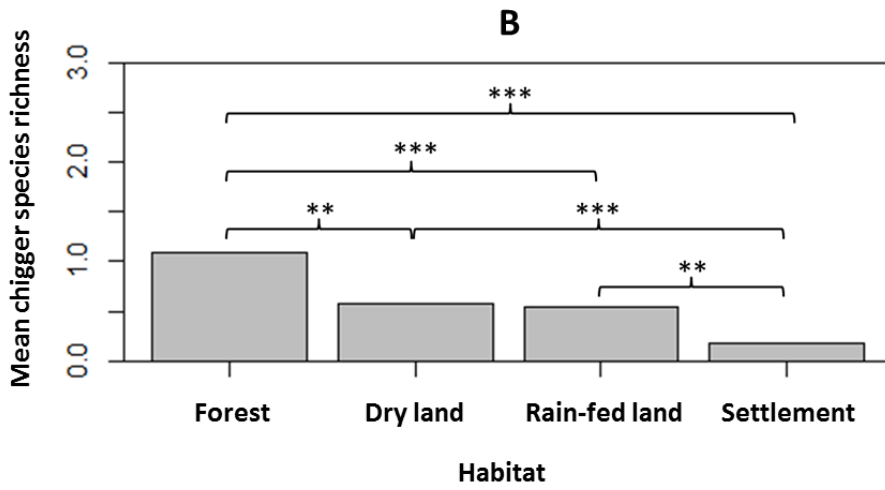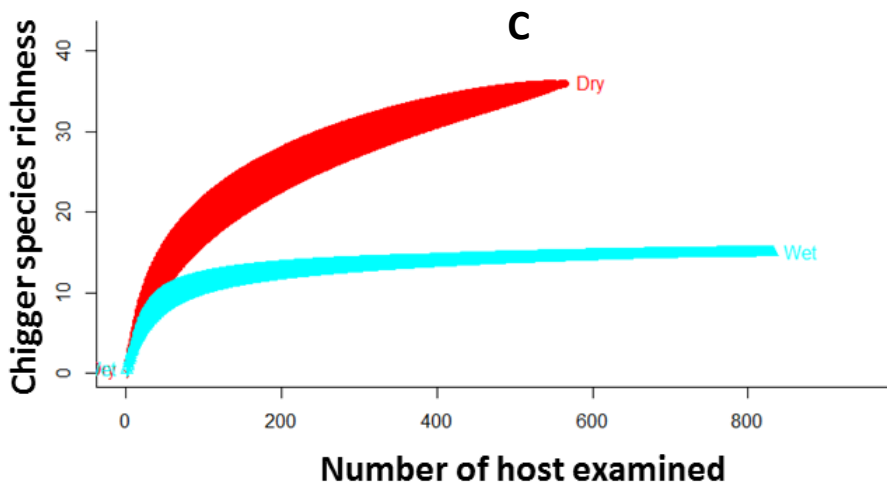

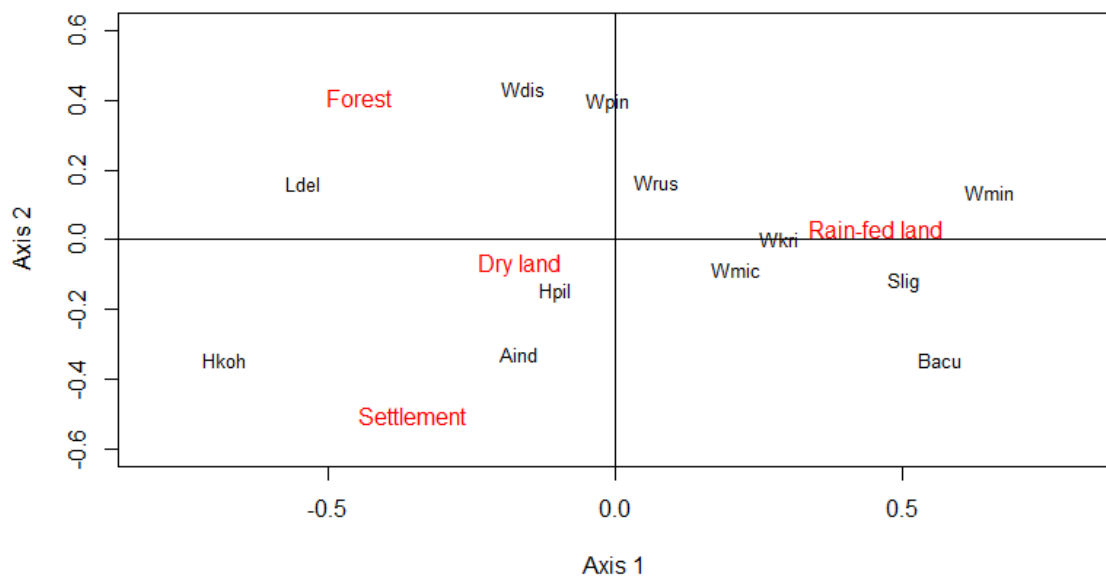

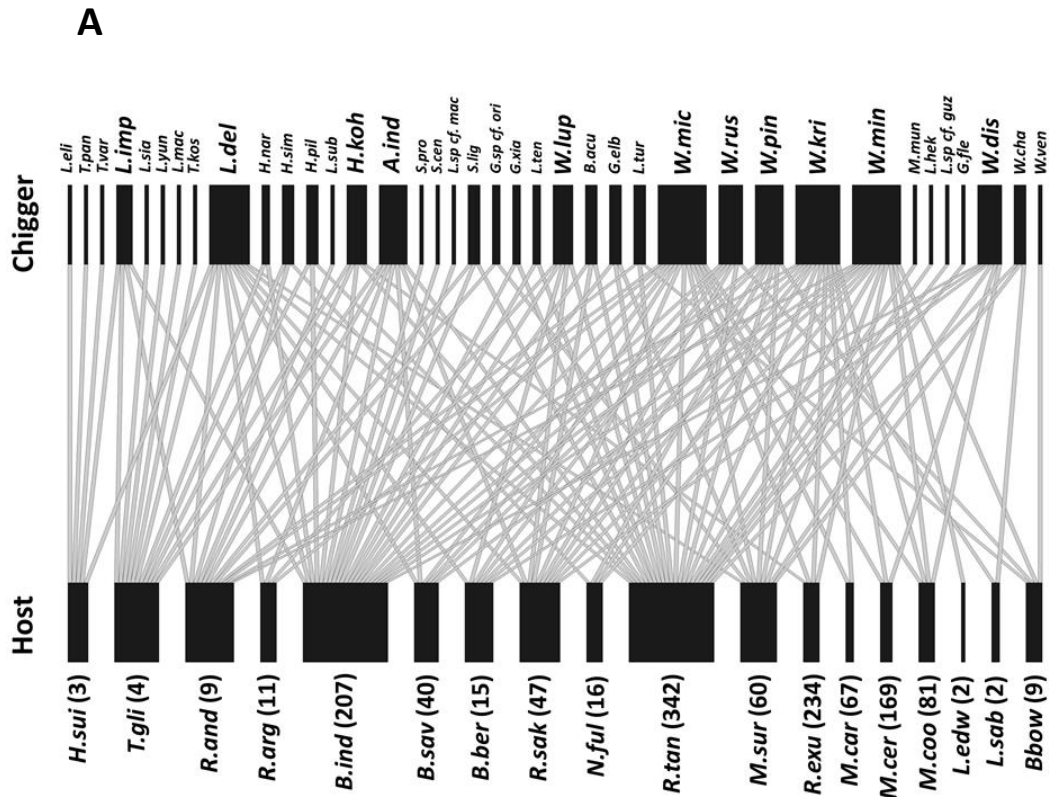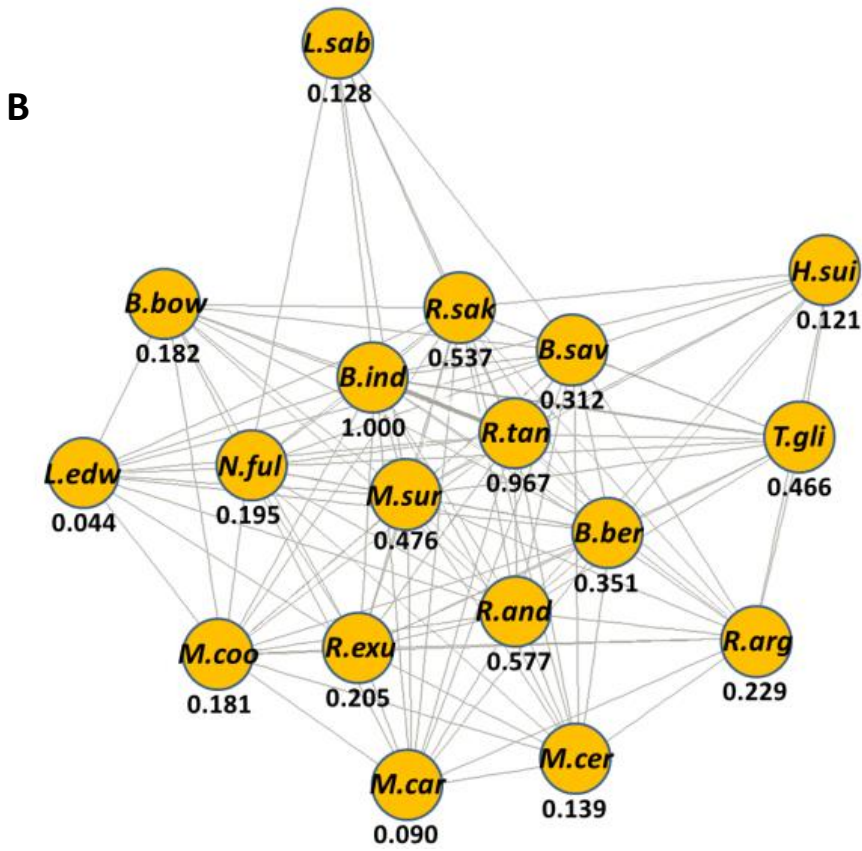



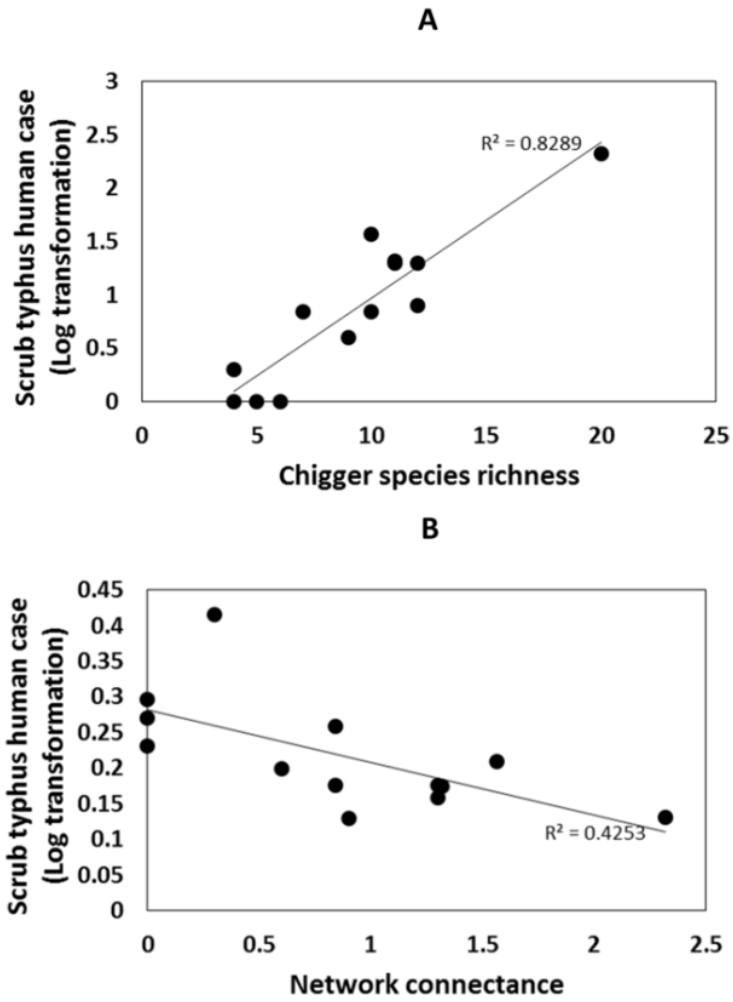

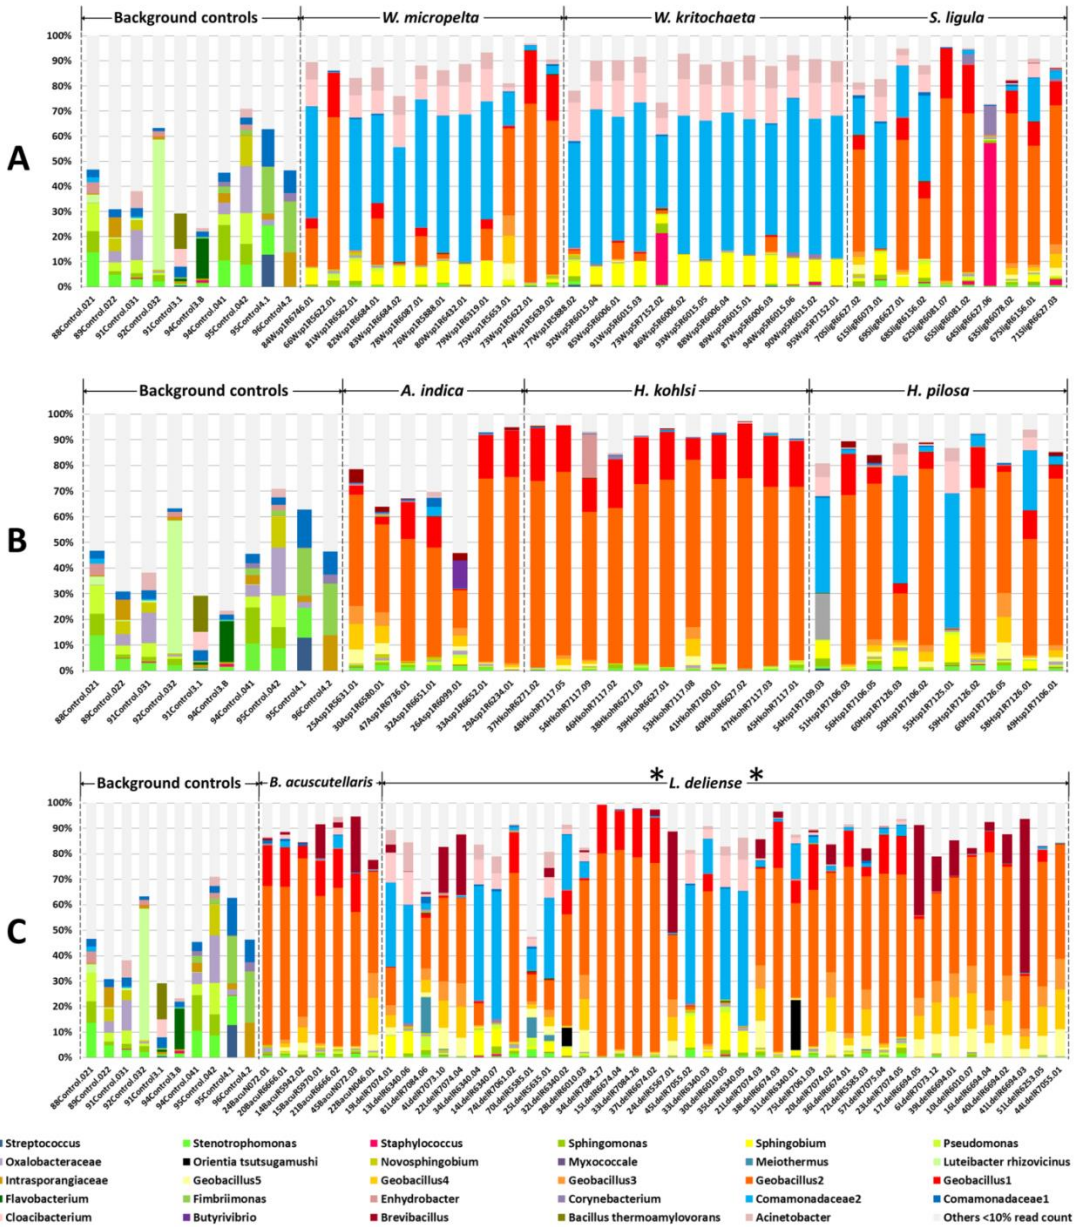

**A**

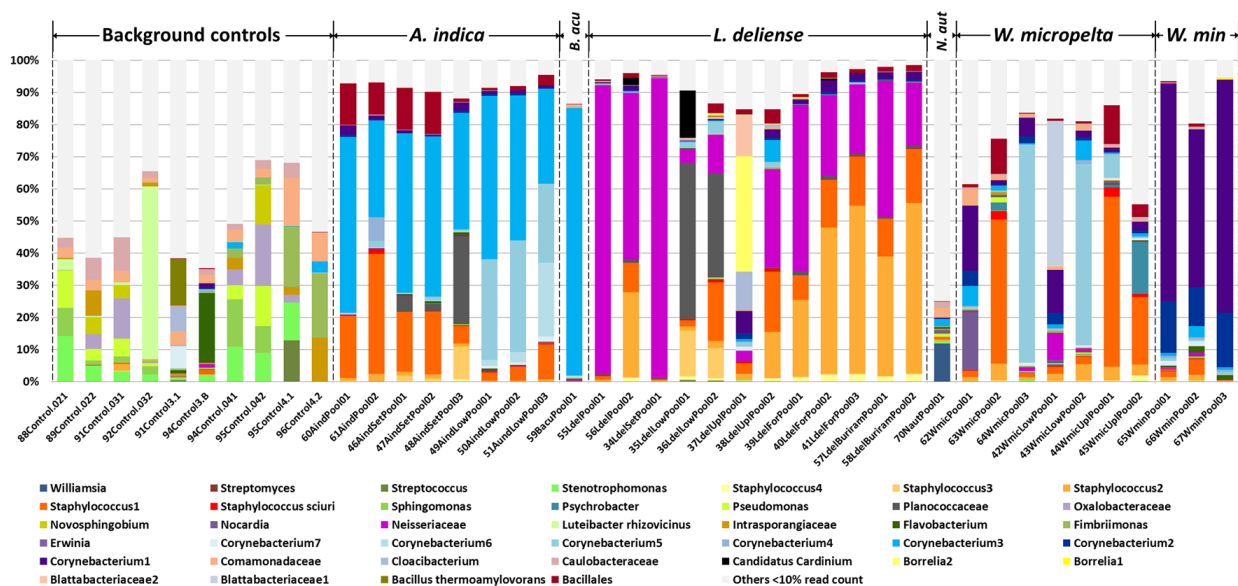

**B**

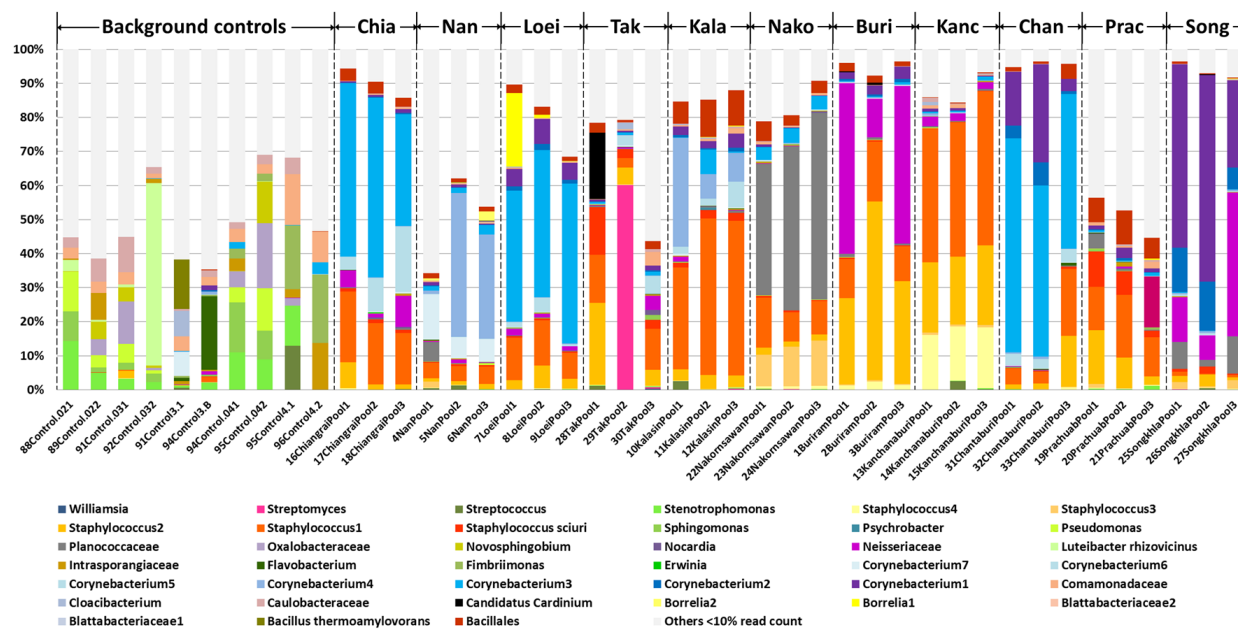

## Individual

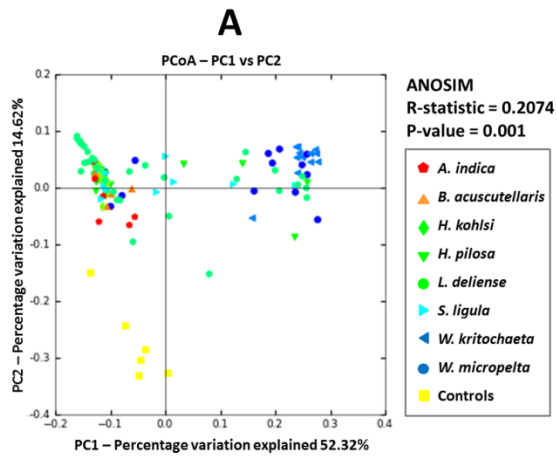

## Pooled

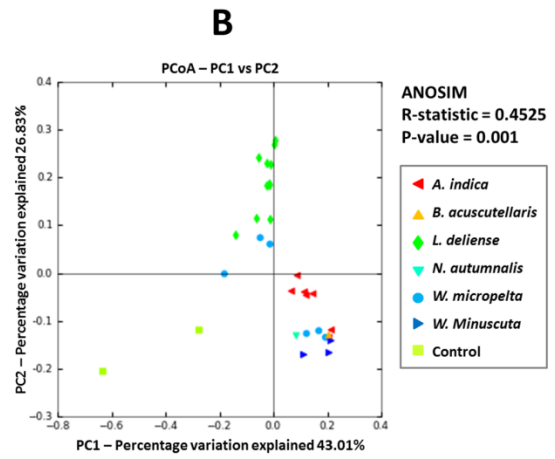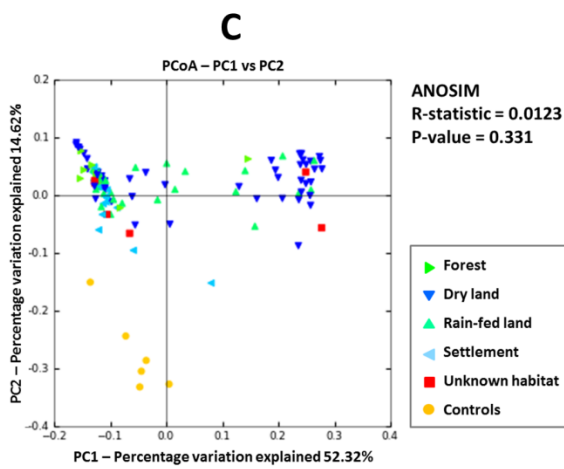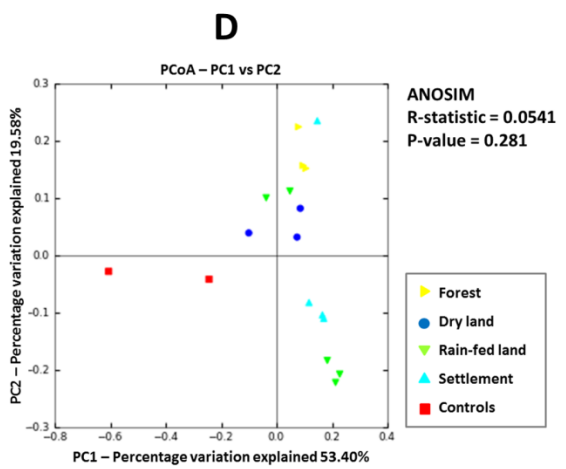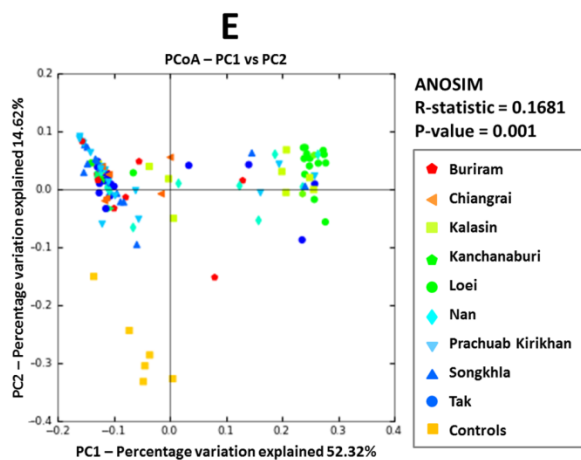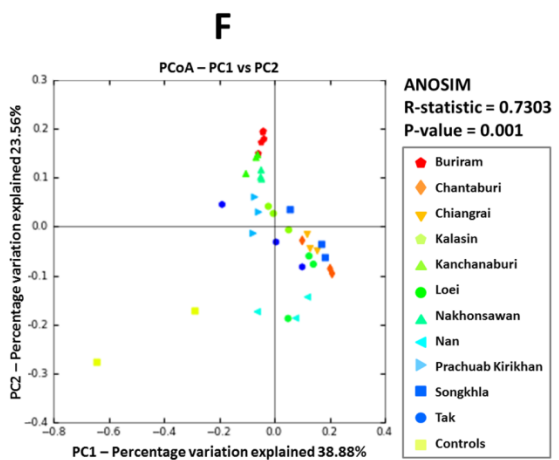

Source: http://biorxiv.org/content/10.1101/523845v1.full.pdf
